# Supplementary material for: In situ precipitation of Cs3Cu2I5 nanocrystals in inorganic glass with long-term water stability for X-ray imaging
Source: Royal Society of Chemistry journal article supplement (doi:10.1039/d3tc00602f), 2023-01-01
Supplement: d3tc00602f1.pdf [file d3tc00602f1.pdf]

---

## Supplementary Information

### In Situ Precipitation of Cs<sub>3</sub>Cu<sub>2</sub>I<sub>5</sub> Nanocrystals in Inorganic Glass with Long-Term Water Stability for X-ray Imaging

Luojia Huang <sup>a</sup>, Hangtao Ye <sup>a</sup>, Weidong Xiang<sup>a,\*</sup>, Hongbin Fan<sup>a,\*</sup> and Xiaojuan

Liang<sup>a,\*</sup>

<sup>a</sup> College of Chemistry and Materials Engineering, Wenzhou University, Wenzhou 325035, China.

\*Corresponding authors: Weidong Xiang (E-mail: wzuxwd001@126.com)

Hongbin Fan (E-mail: hbfan66@wzu.edu.cn)

Xiaojuan Liang (E-mail: lxj6126@126.com)

**Table S1.** Composition of Cs<sub>3</sub>Cu<sub>2</sub>I<sub>5</sub> NCs glass (mol.%) with varying SnO content.

| Sample | SiO <sub>2</sub> | B <sub>2</sub> O <sub>3</sub> | ZnO | CaO | MgO | Al <sub>2</sub> O <sub>3</sub> | Cs <sub>2</sub> O | CuI | NaI | SnO                   |
|--------|------------------|-------------------------------|-----|-----|-----|--------------------------------|-------------------|-----|-----|-----------------------|
| i      | 29               | 35                            | 5   | 1   | 1   | 3                              | 10                | 2   | 12  | 0                     |
| ii     | 29               | 35                            | 5   | 1   | 1   | 3                              | 10                | 2   | 12  | 1.94×10 <sup>-4</sup> |
| iii    | 29               | 35                            | 5   | 1   | 1   | 3                              | 10                | 2   | 12  | 2.92×10 <sup>-4</sup> |
| iv     | 29               | 35                            | 5   | 1   | 1   | 3                              | 10                | 2   | 12  | 5.84×10 <sup>-4</sup> |
| v      | 29               | 35                            | 5   | 1   | 1   | 3                              | 10                | 2   | 12  | 4.86×10 <sup>-4</sup> |
| vi     | 29               | 35                            | 5   | 1   | 1   | 3                              | 10                | 2   | 12  | 3.89×10 <sup>-4</sup> |

\*To accurately compare all glass compositions, the total molar content of the Cs<sub>3</sub>Cu<sub>2</sub>I<sub>5</sub> NCs glass composition was not set to 100%.

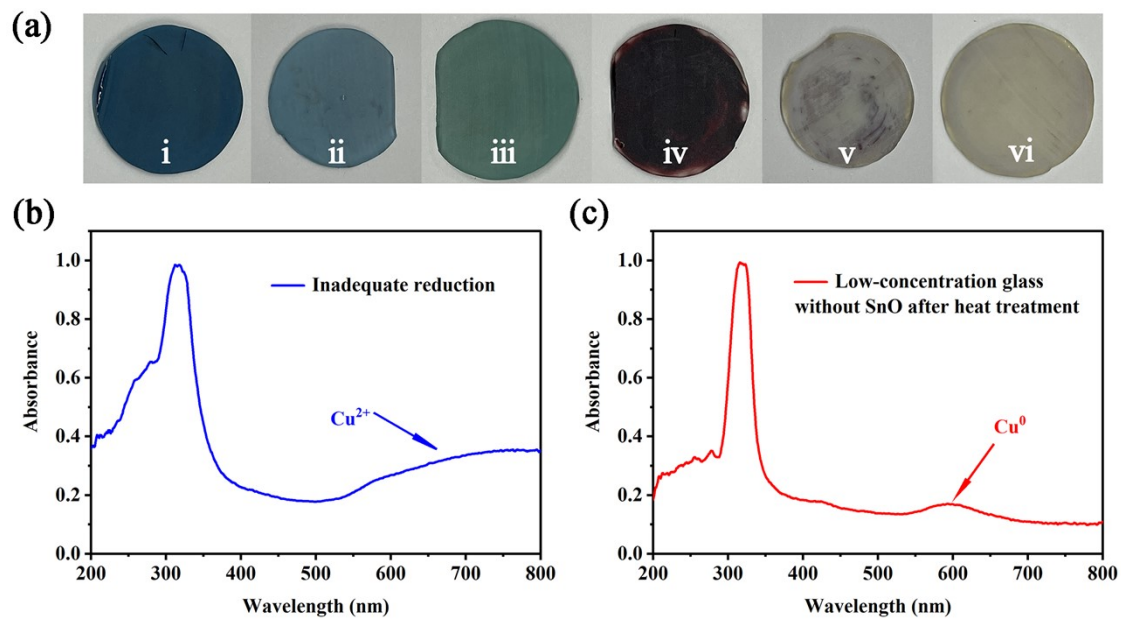

**Figure S1.** (a) Some sample photographs in the experimental optimization process. (b, c) Absorption spectrum of insufficiently reduced glass and low-concentration glass without SnO after heat treatment glass.

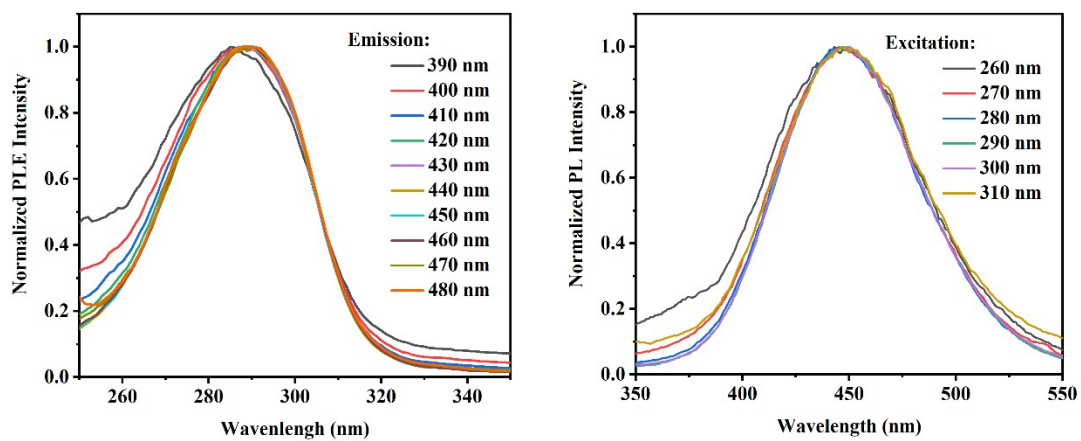

**Figure S2.** (a, b) PLE and PL spectra of  $\text{Cs}_3\text{Cu}_2\text{I}_5$  glass measured at different emission and excitation wavelengths, respectively.

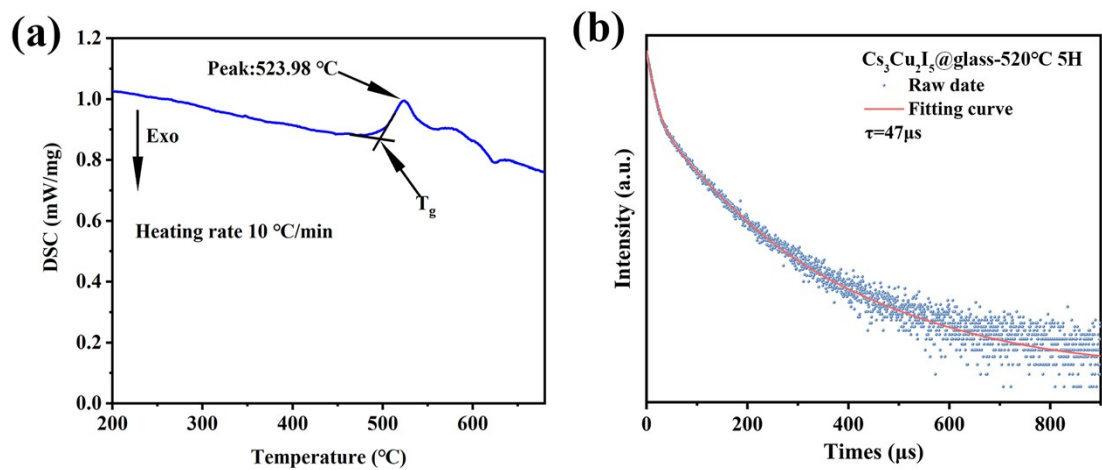

**Figure S3.** (a) DSC curves for Cs<sub>3</sub>Cu<sub>2</sub>I<sub>5</sub> glass. (b) Decay lifetimes of Cs<sub>3</sub>Cu<sub>2</sub>I<sub>5</sub> glass at 520 °C.

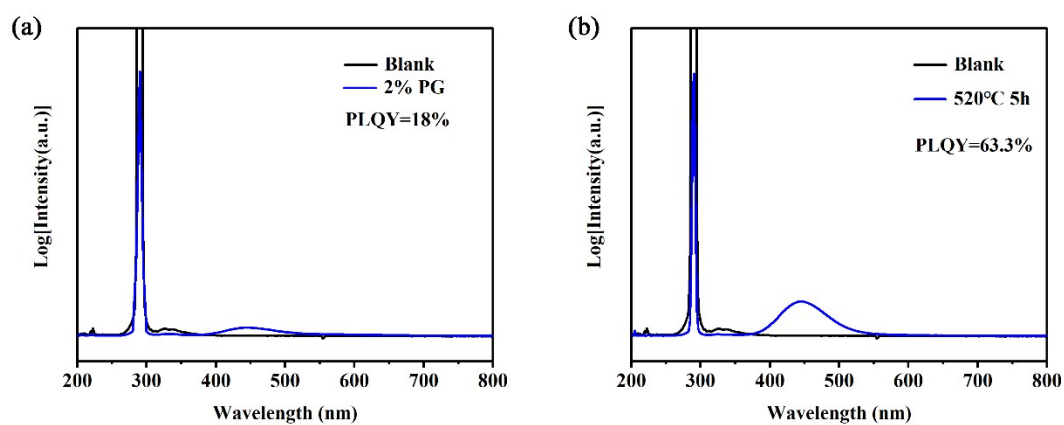

**Figure S4.** The PLQY spectrum of Cs<sub>3</sub>Cu<sub>2</sub>I<sub>5</sub> NCs glass.

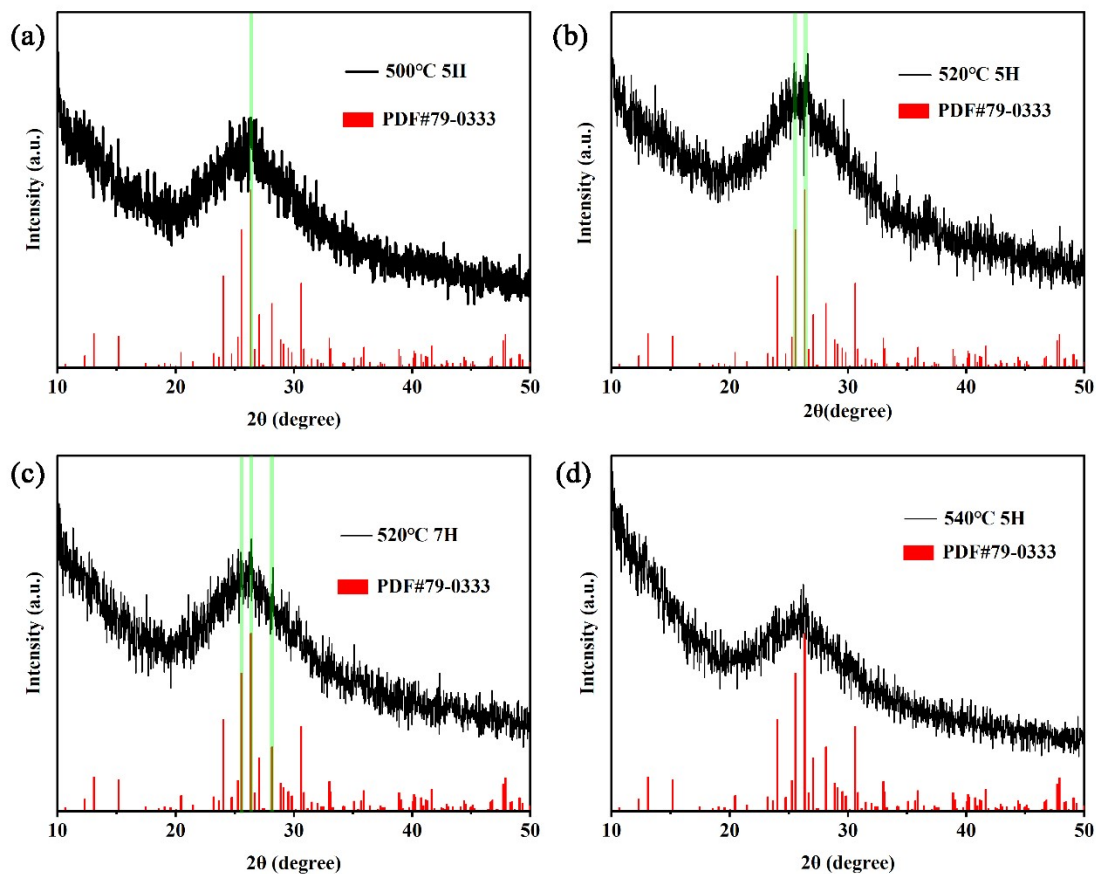

**Figure S5.** XRD patterns of the glass at different heat treatment temperature.

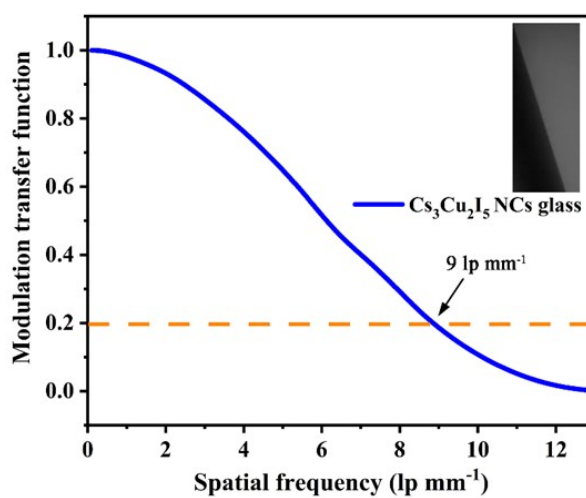

**Figure S6.** Modulation transfer functions (MTF) of X-ray images obtained from  $\text{Cs}_3\text{Cu}_2\text{I}_5$  NCs glass.

**Table S2.** Compare the recently reported performance of Cs<sub>3</sub>Cu<sub>2</sub>I<sub>5</sub>.

| Materials                                                     | Emission<br>peak (nm) | PLQY<br>(%) | stability                      | Ref  |
|---------------------------------------------------------------|-----------------------|-------------|--------------------------------|------|
| Cs <sub>3</sub> Cu <sub>2</sub> I <sub>5</sub> single crystal | 445                   | 91.2        | air-stability                  | (1)  |
| Cs <sub>3</sub> Cu <sub>2</sub> I <sub>5</sub> Nanocrystals   | 441                   | 67          | air stability over 45<br>days  | (2)  |
| Cs <sub>3</sub> Cu <sub>2</sub> I <sub>5</sub> Nanocrystals   | 442                   | 42          | stability in air               | (3)  |
| Cs <sub>3</sub> Cu <sub>2</sub> I <sub>5</sub> Nanocrystals   | 445                   | 29.2        | air stability over 45<br>days  | (4)  |
| Cs <sub>3</sub> Cu <sub>2</sub> I <sub>5</sub> Nanocrystals   | 445                   | 73.7        | air stability over 30<br>days  | (5)  |
| Cs <sub>3</sub> Cu <sub>2</sub> I <sub>5</sub> Films          | 446                   | 50          | air stability over 50<br>days  | (6)  |
| Cs <sub>3</sub> Cu <sub>2</sub> I <sub>5</sub> Films          | 441                   | 58          |                                | (7)  |
| Cs <sub>3</sub> Cu <sub>2</sub> I <sub>5</sub> Nanocrystals   | 445                   | 59          | air stability over 90<br>days  | (8)  |
| Cs <sub>3</sub> Cu <sub>2</sub> I <sub>5</sub> Powder         | 445                   | 49.2        |                                | (9)  |
| Cs <sub>3</sub> Cu <sub>2</sub> I <sub>5</sub> Nanocrystals   | 443                   | 30          | air stability over 16<br>days  | (10) |
| Cs <sub>3</sub> Cu <sub>2</sub> I <sub>5</sub> Films          | 445                   | 76          | air stability over 150<br>days | (11) |
| Cs <sub>3</sub> Cu <sub>2</sub> I <sub>5</sub> Powder         | 445                   | 80          | air stability over 30          | (12) |

|                                                             |     |      |                         |      |
|-------------------------------------------------------------|-----|------|-------------------------|------|
|                                                             |     |      | days                    |      |
| Cs <sub>3</sub> Cu <sub>2</sub> I <sub>5</sub> Nanocrystals | 445 | 87   | air stability over 35   | (13) |
|                                                             |     |      | days                    |      |
| Cs <sub>3</sub> Cu <sub>2</sub> I <sub>5</sub> Powder       | 445 | 89   | air stability over 46   | (14) |
|                                                             |     |      | days                    |      |
| Cs <sub>3</sub> Cu <sub>2</sub> I <sub>5</sub> Nanocrystal  | 446 | 63.3 | water stability over 30 | This |
| glass                                                       |     |      | days                    | work |

#### References:

1. T. Jun, K. Sim, S. Iimura, M. Sasase, H. Kamioka, J. Kim and H. Hosono, *Advanced Materials*, 2018, **30**, 1804547.
2. P. Cheng, L. Sun, L. Feng, S. Yang, Y. Yang, D. Zheng, Y. Zhao, Y. Sang, R. Zhang and D. Wei, *Angewandte Chemie*, 2019, **131**, 16233-16237.
3. P. Sebastia-Luna, J. Navarro-Alapont, M. Sessolo, F. Palazon and H. J. Bolink, *Chemistry of Materials*, 2019, **31**, 10205-10210.
4. Z. Luo, Q. Li, L. Zhang, X. Wu, L. Tan, C. Zou, Y. Liu and Z. Quan, *Small*, 2020, **16**, 1905226.
5. L. Lian, M. Zheng, W. Zhang, L. Yin, X. Du, P. Zhang, X. Zhang, J. Gao, D.

- 
- Zhang and L. Gao, *Advanced Science*, 2020, **7**, 2000195.
6. Z. Ma, Z. Shi, D. Yang, Y. Li, F. Zhang, L. Wang, X. Chen, D. Wu, Y. Tian and Y. Zhang, *Advanced Materials*, 2021, **33**, 2001367.
  7. X. Liu, Y. Yu, F. Yuan, C. Zhao, H. Dong, B. Jiao and Z. Wu, *ACS Applied Materials & Interfaces*, 2020, **12**, 52967-52975.
  8. J. Zhou, K. An, P. He, J. Yang, C. Zhou, Y. Luo, W. Kang, W. Hu, P. Feng and M. Zhou, *Advanced Optical Materials*, 2021, **9**, 2002144.
  9. L. Lian, M. Zheng, P. Zhang, Z. Zheng, K. Du, W. Lei, J. Gao, G. Niu, D. Zhang and T. Zhai, *Chemistry of Materials*, 2020, **32**, 3462-3468.
  10. Y. Li, P. Vashishtha, Z. Zhou, Z. Li, S. B. Shivarudraiah, C. Ma, J. Liu, K. S. Wong, H. Su and J. E. Halpert, *Chemistry of Materials*, 2020, **32**, 5515-5524.
  11. F. Zeng, Y. Guo, W. Hu, Y. Tan, X. Zhang, J. Yang, Q. Lin, Y. Peng, X. Tang and Z. Liu, *Journal of Luminescence*, 2020, **223**, 117178.
  12. X. Huang, Q. Sun and B. Devakumar, *Materials Today Chemistry*, 2020, **17**, 100288.
  13. L. Wang, Z. Shi, Z. Ma, D. Yang, F. Zhang, X. Ji, M. Wang, X. Chen, G. Na and S. Chen, *Nano Letters*, 2020, **20**, 3568-3576.
  14. L.-T. Wang, Z.-Z. Ma, F. Zhang, M. Wang, X. Chen, D. Wu, Y.-T. Tian, X.-J. Li and Z.-F. Shi, *Journal of Materials Chemistry C*, 2021, **9**, 6151-6159.
